# Supplementary material for: Global trends in the incidence and mortality of esophageal cancer from 1990 to 2017
Source: PubMed Central journal article supplement (PMC7520289; doi:10.1002/cam4.3338), 2020-08-04

a

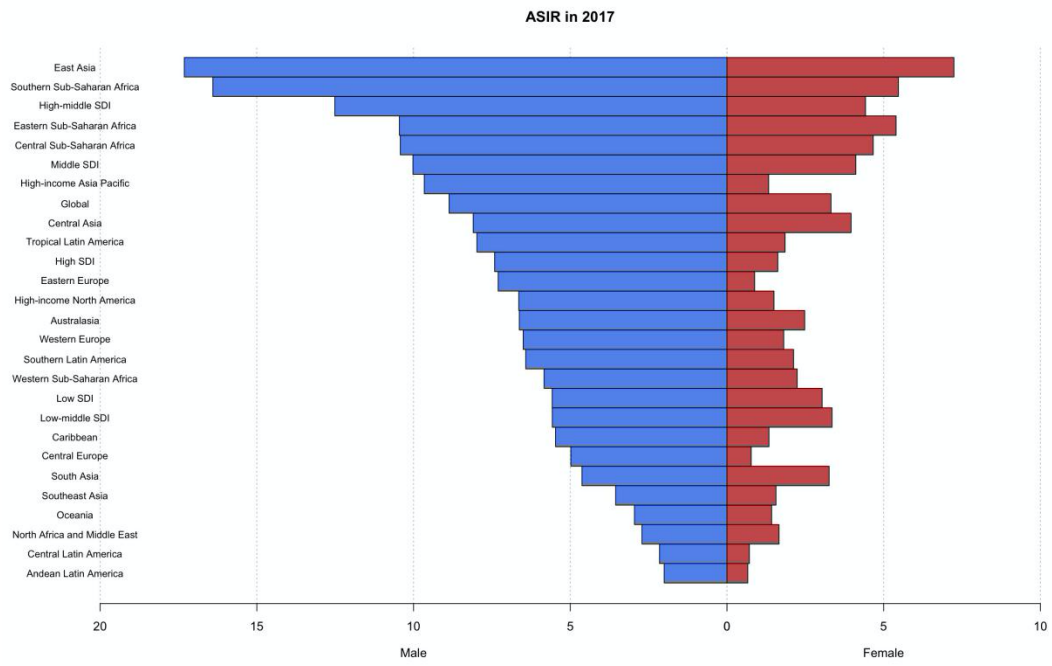

b.

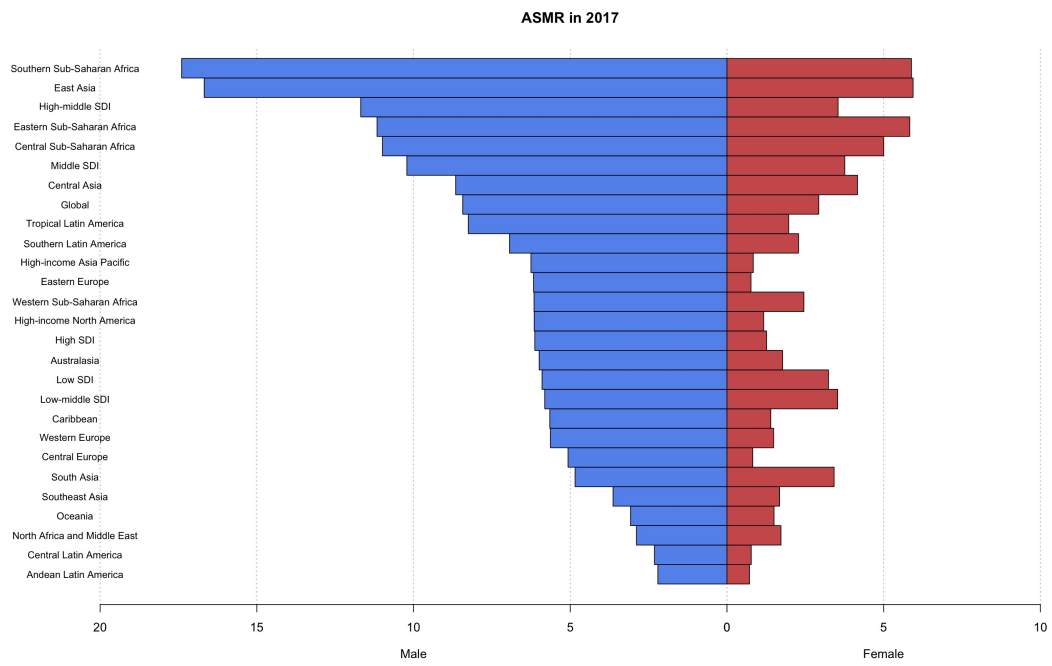

c.

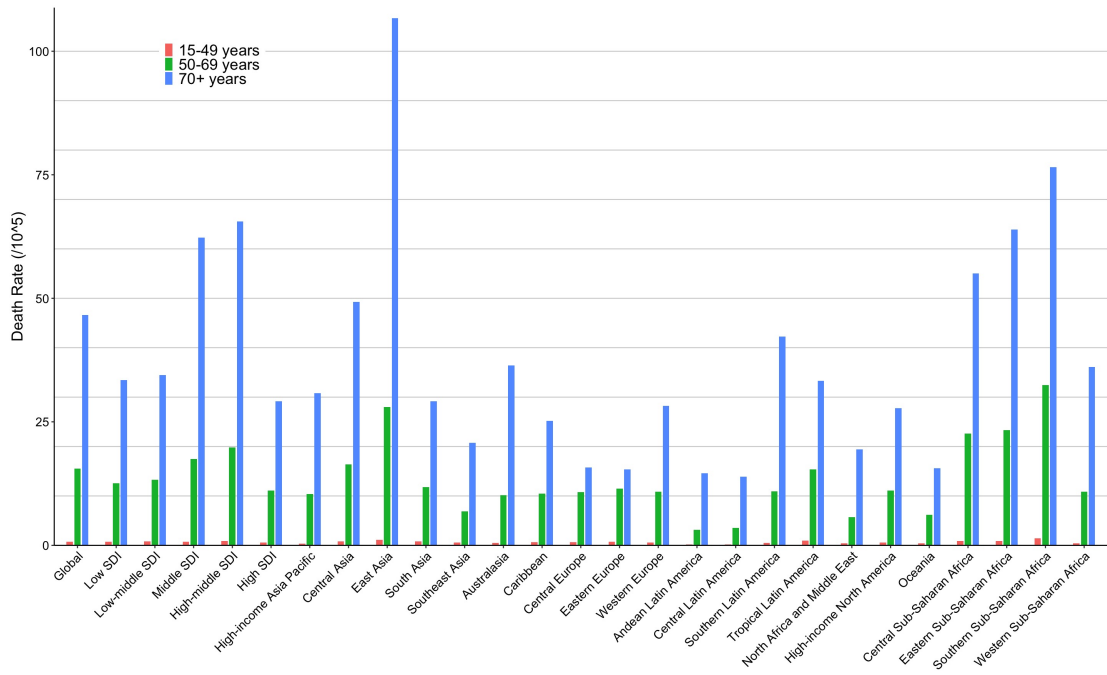

d.

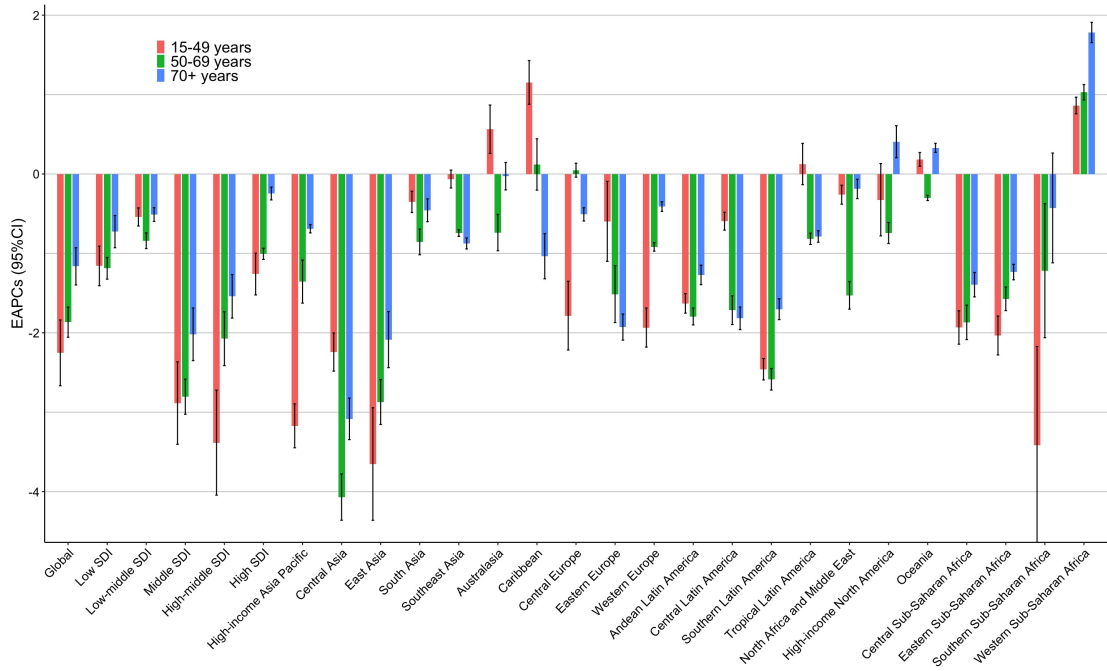

Supplement: CAM4-9-6875-s003.pdf [file CAM4-9-6875-s003.pdf]
