# Supplementary material for: Global trends in the incidence and mortality of esophageal cancer from 1990 to 2017
Source: PubMed Central journal article supplement (PMC7520289; doi:10.1002/cam4.3338), 2020-08-04
Supplement: CAM4-9-6875-s005.pdf [file CAM4-9-6875-s005.pdf]

| Region                           | EAPC (ASIR) | 95% CI(lower) | 95% CI(upper) | EAPC (ASMR) | 95% CI (lower) | 95% CI (upper) |
|----------------------------------|-------------|---------------|---------------|-------------|----------------|----------------|
| Afghanistan                      | -0.71       | -0.82         | -0.60         | -0.68       | -0.79          | -0.57          |
| Albania                          | -1.10       | -1.44         | -0.77         | -1.05       | -1.37          | -0.72          |
| Algeria                          | -0.31       | -0.40         | -0.22         | -0.31       | -0.40          | -0.22          |
| American Samoa                   | 0.74        | 0.47          | 1.02          | 0.72        | 0.44           | 0.99           |
| Andorra                          | 0.03        | -0.05         | 0.11          | -0.53       | -0.58          | -0.48          |
| Angola                           | -1.76       | -1.92         | -1.60         | -1.70       | -1.85          | -1.54          |
| Antigua and Barbuda              | -0.75       | -0.91         | -0.59         | -0.73       | -0.88          | -0.58          |
| Argentina                        | -1.91       | -2.01         | -1.81         | -1.91       | -2.01          | -1.81          |
| Armenia                          | -1.33       | -1.83         | -0.82         | -1.27       | -1.77          | -0.77          |
| Australia                        | -0.28       | -0.39         | -0.16         | -0.30       | -0.39          | -0.20          |
| Austria                          | 0.96        | 0.73          | 1.19          | 0.09        | 0.00           | 0.18           |
| Azerbaijan                       | -0.42       | -0.64         | -0.20         | -0.32       | -0.53          | -0.11          |
| Bahamas                          | -0.69       | -0.99         | -0.38         | -0.66       | -0.96          | -0.36          |
| Bahrain                          | -5.31       | -5.85         | -4.76         | -5.34       | -5.89          | -4.80          |
| Bangladesh                       | -1.88       | -1.99         | -1.77         | -1.69       | -1.83          | -1.55          |
| Barbados                         | -1.24       | -1.38         | -1.11         | -1.26       | -1.40          | -1.13          |
| Belarus                          | 0.63        | 0.41          | 0.84          | -0.01       | -0.29          | 0.28           |
| Belgium                          | 0.93        | 0.66          | 1.20          | 0.47        | 0.20           | 0.75           |
| Belize                           | 0.48        | 0.15          | 0.82          | 0.38        | 0.05           | 0.71           |
| Benin                            | 2.64        | 2.43          | 2.86          | 2.66        | 2.44           | 2.87           |
| Bermuda                          | -1.21       | -1.57         | -0.85         | -1.28       | -1.62          | -0.94          |
| Bhutan                           | -2.12       | -2.31         | -1.93         | -2.03       | -2.22          | -1.85          |
| Bolivia                          | -1.12       | -1.23         | -1.02         | -1.02       | -1.12          | -0.92          |
| Bosnia and Herzegovina           | -1.21       | -1.41         | -1.01         | -1.21       | -1.41          | -1.02          |
| Botswana                         | -1.54       | -1.67         | -1.41         | -1.45       | -1.59          | -1.31          |
| Brazil                           | -0.86       | -0.92         | -0.80         | -0.89       | -0.95          | -0.83          |
| Brunei                           | -1.61       | -1.94         | -1.28         | -2.05       | -2.38          | -1.71          |
| Bulgaria                         | -0.53       | -0.92         | -0.13         | -0.57       | -0.96          | -0.19          |
| Burkina Faso                     | 0.07        | -0.05         | 0.19          | 0.05        | -0.06          | 0.17           |
| Burundi                          | -3.34       | -3.65         | -3.04         | -3.24       | -3.53          | -2.94          |
| Cambodia                         | -2.50       | -2.67         | -2.32         | -2.44       | -2.62          | -2.26          |
| Cameroon                         | 2.00        | 1.78          | 2.21          | 2.04        | 1.82           | 2.26           |
| Canada                           | 0.27        | 0.16          | 0.38          | -0.26       | -0.38          | -0.15          |
| Cape Verde                       | 1.03        | 0.80          | 1.26          | 0.97        | 0.75           | 1.18           |
| Central African Republic         | -1.43       | -1.56         | -1.31         | -1.40       | -1.52          | -1.29          |
| Chad                             | 2.83        | 2.63          | 3.04          | 2.84        | 2.64           | 3.05           |
| Chile                            | -2.96       | -3.23         | -2.68         | -3.00       | -3.29          | -2.72          |
| China                            | -2.06       | -2.37         | -1.75         | -2.59       | -2.92          | -2.25          |
| Colombia                         | -3.61       | -3.80         | -3.42         | -3.61       | -3.81          | -3.42          |
| Comoros                          | -2.81       | -3.11         | -2.50         | -2.73       | -3.03          | -2.43          |
| Costa Rica                       | -2.14       | -2.59         | -1.69         | -2.15       | -2.59          | -1.71          |
| Croatia                          | -1.22       | -1.47         | -0.97         | -1.24       | -1.43          | -1.05          |
| Cuba                             | 1.39        | 1.07          | 1.71          | 1.20        | 0.88           | 1.52           |
| Cyprus                           | 0.66        | 0.30          | 1.01          | 0.22        | -0.16          | 0.61           |
| Czech Republic                   | 0.36        | 0.11          | 0.62          | 0.07        | -0.09          | 0.22           |
| Democratic Republic of the Congo | -1.59       | -1.79         | -1.39         | -1.57       | -1.77          | -1.37          |
| Denmark                          | 0.48        | 0.27          | 0.68          | -0.31       | -0.54          | -0.08          |
| Djibouti                         | -2.14       | -2.38         | -1.91         | -2.10       | -2.33          | -1.86          |
| Dominica                         | 0.14        | -0.16         | 0.45          | 0.10        | -0.20          | 0.40           |
| Dominican Republic               | 0.62        | 0.27          | 0.97          | 0.62        | 0.28           | 0.97           |
| Ecuador                          | -1.73       | -2.05         | -1.40         | -1.69       | -2.00          | -1.38          |
| Egypt                            | 0.71        | 0.61          | 0.82          | 0.69        | 0.60           | 0.79           |
| El Salvador                      | 0.18        | -0.15         | 0.50          | 0.22        | -0.09          | 0.54           |
| Equatorial Guinea                | -1.90       | -2.20         | -1.61         | -1.77       | -2.05          | -1.50          |
| Eritrea                          | -2.81       | -2.99         | -2.62         | -2.71       | -2.89          | -2.53          |
| Estonia                          | 0.86        | 0.42          | 1.30          | -0.55       | -0.89          | -0.22          |
| Ethiopia                         | -2.85       | -2.96         | -2.74         | -2.77       | -2.88          | -2.67          |
| Federated States of Micronesia   | -0.61       | -0.72         | -0.50         | -0.58       | -0.69          | -0.47          |
| Fiji                             | 1.20        | 1.02          | 1.38          | 1.19        | 1.02           | 1.36           |
| Finland                          | -0.05       | -0.15         | 0.04          | -0.79       | -0.93          | -0.66          |

|                  |       |       |       |       |       |       |
|------------------|-------|-------|-------|-------|-------|-------|
| France           | -2.54 | -2.61 | -2.47 | -2.90 | -2.97 | -2.82 |
| Gabon            | -1.23 | -1.35 | -1.11 | -1.20 | -1.32 | -1.08 |
| Gambia           | 0.54  | 0.48  | 0.59  | 0.57  | 0.51  | 0.63  |
| Georgia          | 3.20  | 2.47  | 3.94  | 3.22  | 2.51  | 3.95  |
| Germany          | 0.78  | 0.59  | 0.97  | 0.13  | 0.01  | 0.25  |
| Ghana            | 0.62  | 0.53  | 0.71  | 0.62  | 0.53  | 0.70  |
| Greece           | -0.93 | -1.03 | -0.83 | -1.45 | -1.55 | -1.35 |
| Greenland        | -0.92 | -1.05 | -0.79 | -0.90 | -1.03 | -0.77 |
| Grenada          | -0.05 | -0.56 | 0.45  | -0.12 | -0.62 | 0.38  |
| Guam             | 1.20  | 0.87  | 1.54  | 1.04  | 0.70  | 1.37  |
| Guatemala        | 0.07  | -0.31 | 0.45  | 0.07  | -0.34 | 0.47  |
| Guinea           | 1.33  | 1.22  | 1.44  | 1.31  | 1.20  | 1.41  |
| Guinea-Bissau    | 2.20  | 1.91  | 2.49  | 2.23  | 1.94  | 2.52  |
| Guyana           | 0.08  | -0.15 | 0.30  | 0.03  | -0.19 | 0.25  |
| Haiti            | -0.93 | -1.12 | -0.73 | -0.88 | -1.07 | -0.69 |
| Honduras         | 0.66  | 0.51  | 0.80  | 0.70  | 0.54  | 0.87  |
| Hungary          | -0.89 | -1.39 | -0.40 | -0.76 | -1.25 | -0.27 |
| Iceland          | -0.25 | -0.42 | -0.09 | -0.92 | -1.13 | -0.70 |
| India            | -0.68 | -0.85 | -0.50 | -0.65 | -0.82 | -0.48 |
| Indonesia        | -0.46 | -0.53 | -0.40 | -0.45 | -0.52 | -0.39 |
| Iran             | -0.39 | -0.59 | -0.18 | -0.34 | -0.54 | -0.13 |
| Iraq             | -3.40 | -3.85 | -2.94 | -3.40 | -3.85 | -2.95 |
| Ireland          | -0.23 | -0.38 | -0.08 | -0.95 | -1.14 | -0.76 |
| Israel           | -1.14 | -1.31 | -0.96 | -1.37 | -1.54 | -1.19 |
| Italy            | -1.53 | -1.61 | -1.45 | -2.46 | -2.59 | -2.32 |
| Ivory Coast      | 0.73  | 0.39  | 1.06  | 0.75  | 0.42  | 1.09  |
| Jamaica          | -0.27 | -0.78 | 0.24  | -0.33 | -0.83 | 0.17  |
| Japan            | -0.27 | -0.50 | -0.04 | -0.84 | -1.02 | -0.65 |
| Jordan           | -0.99 | -1.14 | -0.85 | -0.87 | -1.01 | -0.73 |
| Kazakhstan       | -3.97 | -4.16 | -3.78 | -3.95 | -4.14 | -3.76 |
| Kenya            | -0.55 | -0.74 | -0.36 | -0.50 | -0.68 | -0.32 |
| Kiribati         | 0.44  | 0.08  | 0.79  | 0.46  | 0.12  | 0.81  |
| Kuwait           | -1.36 | -1.60 | -1.12 | -1.34 | -1.58 | -1.10 |
| Kyrgyzstan       | -3.35 | -3.61 | -3.09 | -3.25 | -3.51 | -2.99 |
| Laos             | -2.70 | -2.87 | -2.52 | -2.65 | -2.82 | -2.47 |
| Latvia           | 1.60  | 1.26  | 1.94  | 0.77  | 0.44  | 1.10  |
| Lebanon          | -0.44 | -0.63 | -0.25 | -0.68 | -0.82 | -0.54 |
| Lesotho          | 0.55  | 0.26  | 0.83  | 0.54  | 0.26  | 0.82  |
| Liberia          | 2.07  | 1.71  | 2.44  | 2.15  | 1.79  | 2.51  |
| Libya            | 0.97  | 0.84  | 1.11  | 0.96  | 0.82  | 1.11  |
| Lithuania        | 1.47  | 1.13  | 1.80  | 1.21  | 0.88  | 1.54  |
| Luxembourg       | -0.64 | -0.75 | -0.53 | -1.32 | -1.43 | -1.20 |
| Macedonia        | -0.11 | -0.26 | 0.05  | -0.15 | -0.30 | 0.00  |
| Madagascar       | -1.84 | -1.97 | -1.72 | -1.78 | -1.90 | -1.66 |
| Malawi           | -0.03 | -0.45 | 0.40  | -0.03 | -0.44 | 0.38  |
| Malaysia         | -0.82 | -1.07 | -0.56 | -0.92 | -1.16 | -0.69 |
| Maldives         | -4.00 | -4.23 | -3.77 | -4.04 | -4.27 | -3.82 |
| Mali             | -0.32 | -0.50 | -0.14 | -0.28 | -0.45 | -0.11 |
| Malta            | -0.55 | -0.68 | -0.41 | -0.96 | -1.10 | -0.83 |
| Marshall Islands | -0.07 | -0.30 | 0.15  | -0.06 | -0.28 | 0.17  |
| Mauritania       | 0.88  | 0.64  | 1.12  | 0.99  | 0.76  | 1.23  |
| Mauritius        | -1.06 | -1.20 | -0.91 | -1.14 | -1.29 | -1.00 |
| Mexico           | -1.27 | -1.43 | -1.10 | -1.34 | -1.50 | -1.18 |
| Moldova          | -1.38 | -1.79 | -0.96 | -1.53 | -1.92 | -1.14 |
| Mongolia         | -1.65 | -1.99 | -1.30 | -1.64 | -1.97 | -1.31 |
| Montenegro       | -0.04 | -0.16 | 0.08  | 0.01  | -0.10 | 0.12  |
| Morocco          | -0.32 | -0.41 | -0.23 | -0.27 | -0.37 | -0.18 |
| Mozambique       | 0.27  | 0.17  | 0.37  | 0.23  | 0.14  | 0.32  |
| Myanmar          | -1.24 | -1.34 | -1.15 | -1.17 | -1.27 | -1.08 |
| Namibia          | -1.10 | -1.49 | -0.71 | -1.05 | -1.44 | -0.67 |
| Nepal            | -0.79 | -1.40 | -0.19 | -0.70 | -1.30 | -0.10 |
| Netherlands      | 2.47  | 2.18  | 2.75  | 1.78  | 1.48  | 2.09  |
| New Zealand      | 0.04  | -0.16 | 0.24  | -1.06 | -1.17 | -0.95 |
| Nicaragua        | -1.77 | -1.95 | -1.59 | -1.78 | -1.96 | -1.59 |

|                                  |       |       |       |       |       |       |
|----------------------------------|-------|-------|-------|-------|-------|-------|
| Niger                            | 1.55  | 1.29  | 1.81  | 1.61  | 1.35  | 1.87  |
| Nigeria                          | 1.46  | 1.32  | 1.60  | 1.54  | 1.40  | 1.69  |
| North Korea                      | -0.30 | -0.43 | -0.18 | -0.34 | -0.48 | -0.20 |
| Northern Mariana Islands         | 1.11  | 0.76  | 1.45  | 0.93  | 0.61  | 1.24  |
| Norway                           | 0.52  | 0.34  | 0.70  | -0.33 | -0.44 | -0.22 |
| Oman                             | -0.59 | -0.74 | -0.44 | -0.63 | -0.78 | -0.47 |
| Pakistan                         | 0.17  | -0.06 | 0.40  | 0.22  | 0.00  | 0.44  |
| Palestine                        | -1.08 | -1.32 | -0.85 | -1.06 | -1.30 | -0.83 |
| Panama                           | -0.03 | -0.27 | 0.22  | -0.13 | -0.37 | 0.11  |
| Papua New Guinea                 | -0.31 | -0.35 | -0.28 | -0.25 | -0.29 | -0.22 |
| Paraguay                         | 0.22  | 0.07  | 0.38  | 0.17  | 0.02  | 0.32  |
| Peru                             | -1.83 | -2.10 | -1.57 | -1.84 | -2.11 | -1.57 |
| Philippines                      | -0.84 | -1.00 | -0.68 | -0.86 | -1.02 | -0.69 |
| Poland                           | -0.93 | -1.01 | -0.84 | -0.93 | -1.02 | -0.85 |
| Portugal                         | -0.94 | -1.14 | -0.75 | -1.33 | -1.44 | -1.22 |
| Puerto Rico                      | -4.14 | -4.39 | -3.89 | -4.31 | -4.56 | -4.06 |
| Qatar                            | -3.51 | -3.77 | -3.25 | -3.58 | -3.84 | -3.31 |
| Republic of Congo                | -2.09 | -2.28 | -1.89 | -1.99 | -2.18 | -1.81 |
| Romania                          | 1.14  | 0.83  | 1.45  | 1.09  | 0.79  | 1.40  |
| Russia                           | -1.28 | -1.59 | -0.97 | -1.93 | -2.22 | -1.63 |
| Rwanda                           | -4.10 | -4.49 | -3.70 | -3.95 | -4.33 | -3.57 |
| Saint Lucia                      | -0.96 | -1.28 | -0.63 | -1.00 | -1.32 | -0.68 |
| Saint Vincent and the Grenadines | 0.55  | 0.16  | 0.94  | 0.50  | 0.11  | 0.89  |
| Samoa                            | -0.08 | -0.18 | 0.01  | -0.01 | -0.11 | 0.09  |
| Sao Tome and Principe            | 2.78  | 2.55  | 3.00  | 2.82  | 2.60  | 3.05  |
| Saudi Arabia                     | -0.11 | -0.39 | 0.17  | -0.07 | -0.33 | 0.18  |
| Senegal                          | 1.64  | 1.37  | 1.91  | 1.68  | 1.42  | 1.95  |
| Serbia                           | 0.11  | -0.04 | 0.26  | 0.15  | 0.00  | 0.29  |
| Seychelles                       | -0.91 | -1.01 | -0.82 | -0.95 | -1.04 | -0.86 |
| Sierra Leone                     | 2.30  | 2.11  | 2.50  | 2.35  | 2.15  | 2.55  |
| Singapore                        | -2.03 | -2.20 | -1.86 | -3.76 | -3.91 | -3.60 |
| Slovakia                         | -0.55 | -0.90 | -0.19 | -0.27 | -0.50 | -0.04 |
| Slovenia                         | -1.98 | -2.12 | -1.84 | -1.90 | -2.03 | -1.76 |
| Solomon Islands                  | -0.27 | -0.42 | -0.13 | -0.22 | -0.36 | -0.08 |
| Somalia                          | -2.15 | -2.39 | -1.92 | -2.08 | -2.31 | -1.86 |
| South Africa                     | -1.66 | -2.57 | -0.75 | -1.49 | -2.38 | -0.59 |
| South Korea                      | -2.22 | -2.41 | -2.04 | -4.03 | -4.30 | -3.77 |
| South Sudan                      | -1.93 | -2.15 | -1.71 | -1.90 | -2.12 | -1.69 |
| Spain                            | -0.94 | -1.04 | -0.84 | -1.61 | -1.71 | -1.52 |
| Sri Lanka                        | -0.06 | -0.52 | 0.40  | -0.19 | -0.67 | 0.30  |
| Sudan                            | -0.43 | -0.52 | -0.34 | -0.37 | -0.47 | -0.27 |
| Suriname                         | 0.14  | -0.07 | 0.35  | 0.13  | -0.09 | 0.34  |
| Swaziland                        | -0.32 | -0.80 | 0.16  | -0.34 | -0.81 | 0.13  |
| Sweden                           | 0.01  | -0.18 | 0.20  | 0.01  | -0.11 | 0.13  |
| Switzerland                      | -0.24 | -0.45 | -0.04 | -0.78 | -0.95 | -0.61 |
| Syria                            | -0.42 | -0.64 | -0.20 | -0.39 | -0.60 | -0.17 |
| Taiwan                           | 2.24  | 2.04  | 2.43  | 1.00  | 0.78  | 1.22  |
| Tajikistan                       | -2.37 | -2.84 | -1.91 | -2.40 | -2.86 | -1.94 |
| Tanzania                         | -1.34 | -1.51 | -1.16 | -1.32 | -1.49 | -1.15 |
| Thailand                         | -0.36 | -0.58 | -0.14 | -0.68 | -0.89 | -0.47 |
| Timor-Leste                      | -1.74 | -1.93 | -1.55 | -1.69 | -1.88 | -1.50 |
| Togo                             | 2.09  | 1.91  | 2.27  | 2.11  | 1.93  | 2.29  |
| Tonga                            | 0.17  | -0.04 | 0.39  | 0.14  | -0.08 | 0.36  |
| Trinidad and Tobago              | -2.66 | -3.05 | -2.26 | -2.72 | -3.11 | -2.31 |
| Tunisia                          | -0.26 | -0.40 | -0.11 | -0.26 | -0.39 | -0.12 |
| Turkey                           | -2.54 | -3.09 | -2.00 | -2.55 | -3.11 | -1.99 |
| Turkmenistan                     | -5.01 | -5.80 | -4.21 | -5.00 | -5.78 | -4.22 |
| Uganda                           | 0.06  | -0.20 | 0.31  | 0.07  | -0.17 | 0.32  |
| UK                               | 0.33  | 0.13  | 0.54  | 0.05  | -0.15 | 0.25  |
| Ukraine                          | -0.26 | -0.61 | 0.10  | -0.79 | -1.12 | -0.46 |
| United Arab Emirates             | 1.24  | 1.02  | 1.47  | 1.20  | 0.97  | 1.43  |
| Uruguay                          | -1.74 | -1.89 | -1.60 | -1.76 | -1.91 | -1.61 |
| USA                              | 0.01  | -0.19 | 0.20  | -0.24 | -0.38 | -0.10 |
| Uzbekistan                       | -4.97 | -5.31 | -4.62 | -4.97 | -5.32 | -4.61 |
| Vanuatu                          | 0.05  | 0.02  | 0.08  | 0.11  | 0.08  | 0.13  |
| Venezuela                        | -1.15 | -1.53 | -0.77 | -1.23 | -1.62 | -0.83 |
| Vietnam                          | -0.32 | -0.40 | -0.24 | -0.37 | -0.46 | -0.28 |
| Virgin Islands, U.S.             | 0.58  | 0.43  | 0.73  | 0.50  | 0.35  | 0.65  |
| Yemen                            | -1.01 | -1.10 | -0.91 | -0.95 | -1.05 | -0.86 |
| Zambia                           | -1.77 | -2.05 | -1.49 | -1.74 | -2.01 | -1.47 |
| Zimbabwe                         | 0.62  | -0.03 | 1.26  | 0.57  | -0.06 | 1.20  |
