# Supplementary material for: Global trends in the incidence and mortality of esophageal cancer from 1990 to 2017
Source: PubMed Central journal article supplement (PMC7520289; doi:10.1002/cam4.3338), 2020-08-04
Supplement: CAM4-9-6875-s006.pdf [file CAM4-9-6875-s006.pdf]

| Age Group | Persent of Population | Rounded |
|-----------|-----------------------|---------|
| 0-1       | 2.078241644           | 2.08    |
| 1-4       | 8.102445249           | 8.1     |
| 5-9       | 9.677325318           | 9.68    |
| 10-14     | 8.952609678           | 8.95    |
| 15-19     | 8.382858071           | 8.38    |
| 20-24     | 8.01707612            | 8.02    |
| 25-29     | 7.778732811           | 7.78    |
| 30-34     | 7.331586983           | 7.33    |
| 35-39     | 6.775951151           | 6.78    |
| 40-44     | 6.089034035           | 6.09    |
| 45-49     | 5.465811837           | 5.47    |
| 50-54     | 4.873621621           | 4.87    |
| 55-59     | 4.251640217           | 4.25    |
| 60-64     | 3.5961672             | 3.6     |
| 65-69     | 2.914902912           | 2.91    |
| 70-74     | 2.130279933           | 2.13    |
| 75-79     | 1.608333391           | 1.61    |
| 80-84     | 1.078423497           | 1.08    |
| 85-89     | 0.603162091           | 0.6     |
| 90-94     | 0.234261019           | 0.23    |
| 95+       | 0.057535221           | 0.06    |
